# Supplementary material for: Smokeless tobacco utilization among tribal communities in India: A population-based cross-sectional analysis of the Global Adult Tobacco Survey, 2016–2017
Source: Frontiers journal article supplement (doi:10.3389/fpubh.2023.1135143), 2023-03-09
Supplement: Table_1.pdf [file Table_1.pdf]

| <b>Supplementary Table S1: Description of variables in the study, Global Adult Tobacco Survey (GATS-2), 2017-18</b> |                                                                                 |                                                                                                                                                                                                                                                                                                                                                                                                                                            |
|---------------------------------------------------------------------------------------------------------------------|---------------------------------------------------------------------------------|--------------------------------------------------------------------------------------------------------------------------------------------------------------------------------------------------------------------------------------------------------------------------------------------------------------------------------------------------------------------------------------------------------------------------------------------|
| <b>Variables</b>                                                                                                    | <b>Question</b>                                                                 | <b>Categories</b>                                                                                                                                                                                                                                                                                                                                                                                                                          |
| <b>Age</b>                                                                                                          | What is the age of the selected person? (Age in completed years)                | Recoded into:<br>1. 15-30 years<br>2. 31–45 years<br>3. 46-60 years<br>3. $\geq 60$ years                                                                                                                                                                                                                                                                                                                                                  |
| <b>Gender</b>                                                                                                       | The gender was recorded based on the observation                                | 1.Male<br>2. Female                                                                                                                                                                                                                                                                                                                                                                                                                        |
| <b>Residence</b>                                                                                                    | Based on the residence status                                                   | 1.Urban<br>2. Rural                                                                                                                                                                                                                                                                                                                                                                                                                        |
| <b>Region</b>                                                                                                       | Based on the national region                                                    | 1.North<br>2. Central<br>3. East<br>4. North East<br>5. West<br>6. South                                                                                                                                                                                                                                                                                                                                                                   |
| <b>Educational Qualification</b>                                                                                    | What is the highest level of education you have completed?                      | Recoded into:<br>1=1 No formal education (No formal schooling)<br>2=2 Primary Incomplete (Less than primary school completed)<br>3/4=3 Primary but not Secondary (Primary school completed + Less than secondary school completed)<br>5/6=4 Secondary and Higher Secondary (Secondary school completed + Higher secondary school completed)<br>7/8=5 "Graduation and Above (College/university completed + Post graduate degree completed) |
| <b>Occupation</b>                                                                                                   | Which of the following best describes your work status over the past 12 months? | Recoded into:<br>1/2=1 Govt. and Non-Govt. employee (Government employee + non-government employee)<br>3=2 Daily wage (Daily wage/ casual labourer)<br>4=3 Self-employed (Self-employed)<br>5=4 Student (Student)<br>6=5 Homemaker (Homemaker)<br>7/9=6 Unemployed (Unemployed, able to work + Unemployed, unable to work)                                                                                                                 |
| <b>Wealth Index</b>                                                                                                 | PCA of 14 household assets                                                      | Recoded into:<br>1.Poor class<br>2. Middle class<br>3. Rich class                                                                                                                                                                                                                                                                                                                                                                          |

|                          |                                                                                                                                                                                   |                                                                                                      |
|--------------------------|-----------------------------------------------------------------------------------------------------------------------------------------------------------------------------------|------------------------------------------------------------------------------------------------------|
| <b>Smoking tobacco</b>   | Do you currently smoke tobacco on a daily basis, less than daily or not at all?                                                                                                   | Recoded into:<br>1/2=1 Smoker (Daily + Less than daily)<br>3=2 Non-smoker (Not at all)               |
| <b>Smokeless tobacco</b> | Do you currently use smokeless tobacco on a daily basis, less than daily or not at all?                                                                                           | Recoded into:<br>1/2=1 Smokeless tobacco user (Daily + Less than daily)<br>3=2 Non-user (Not at all) |
| <b>Betel</b>             | On average, how many times a day do you use the following products? Also, let me know if you use the product, but not every day. Betel quid with tobacco?                         | Recoded into:<br>(0=0) (999=0) non-user<br>1/888=1 Betel quid user                                   |
| <b>Khaini</b>            | On average, how many times a day do you use the following products? Also, let me know if you use the product, but not every day) Khaini or tobacco lime mixture.                  | Recoded into:<br>(0=0) (999=0) non-user<br>1/888=1 Khaini user                                       |
| <b>Gutkha</b>            | On average, how many times a day do you use the following products? Also, let me know if you use the product, but not every day.) Gutka, areca nut-tobacco lime mixture, or mawa? | Recoded into:<br>(0=0) (999=0) non-user<br>1/888=1 Gutkha user                                       |
| <b>Gul</b>               | On average, how many times a day do you use the following products? Also, let me know if you use the product, but not every day.) Oral tobacco use (as mishri, qul, gudakhu)?     | Recoded into:<br>(0=0) (999=0) non-user<br>1/888=1 Gul user                                          |
| <b>Pan</b>               | On average, how many times a day do you use the following products? Also, let me know if you use the product, but not every day.) Pan masala together with tobacco?               | Recoded into:<br>(0=0) (999=0) non-user<br>1/888=1 Pan user                                          |
| <b>Snuff</b>             | On average, how many times a day do you use the following products? Also, let me know if you use the product, but not every day.) Nasal use of snuff?                             | Recoded into:<br>(0=0) (999=0) non-user<br>1/888=1 Snuff user                                        |
| <b>Others</b>            | On average, how many times a day do you use the following products? Also, let me know if                                                                                          | Recoded into:<br>(0=0) (999=0) non-user<br>1/888=1 Others                                            |

|                            |                                                                                               |                                                                               |
|----------------------------|-----------------------------------------------------------------------------------------------|-------------------------------------------------------------------------------|
|                            | you use the product, but not every day.) Any others?                                          |                                                                               |
| <b>Willingness to quit</b> | Which of the following best describes your thinking about quitting smoking?                   | Recoded into:<br>1/3=1 (Willing to quit)<br>(4=0) (7=0) (Not willing to quit) |
| <b>Attempted to quit</b>   | During the past 12 months, did you use any of the following to try to stop smokeless tobacco? | Recoded into:<br>1. Yes<br>2. No                                              |
